# Supplementary material for: In situconstruction of FeCo alloy nanoparticles embedded in nitrogen-doped bamboo-like carbon nanotubes as a bifunctional electrocatalyst for Zn–air batteries
Source: Royal Society of Chemistry journal article supplement (doi:10.1039/d2dt02132c), 2022-01-01
Supplement: d2dt02132c1.pdf [file d2dt02132c1.pdf]

## Supporting information

### **In Situ Construction of FeCo Alloy Nanoparticles Embedded in Nitrogen-Doped Bamboo-like Carbon Nanotubes as a Bifunctional Electrocatalyst for Zn-Air Battery**

Junxue Chen <sup>a, †</sup>, Jie Zhu <sup>c</sup>, SiJia Li <sup>a</sup>, Zhonglin Li <sup>a</sup>, Chengzhi Wu <sup>a</sup>, Ding Wang <sup>a</sup>, Zhihong Luo <sup>a</sup>, Yibing Li <sup>a, \*</sup>, Kun Luo <sup>b, \*</sup>

<sup>a</sup> *Key Lab of New Processing Technology for Nonferrous Metal & Materials, Ministry of Education; School of Materials Science and Engineering, Guilin University of Technology, Guilin 541000, P. R. China*

<sup>b</sup> *School of Materials Science and Engineering, Changzhou University, Changzhou 213164, P. R. China*

<sup>c</sup> *School of Chemistry and Chemical Engineering, Beijing Institute of Technology, Beijing 100081, P. R. China*

\* Corresponding Authors: *E-mails:* [lybgems@glut.edu.cn](mailto:lybgems@glut.edu.cn) (Libing Li), [luokun@cczu.edu.cn](mailto:luokun@cczu.edu.cn) (Kun Luo)

## Characterizations

The crystal structure of the samples was analyzed by X-ray diffraction (XRD, X'Pert PRO) using Cu K $\alpha$  radiation ( $\lambda = 1.5406 \text{ \AA}$ ). Field emission scanning electron microscopy (FESEM) for microstructures was performed using a Hitachi S-4800 instrument operating at a voltage of 5 kV. Transmission electron microscopy (TEM), high-resolution transmission electron microscopy (HRTEM), high-annular dark-field and bright-field scanning transmission electron microscopy (STEM), energy dispersive X-ray spectroscopy (EDS) images were obtained on Transmission Electron Microscope (Titan G2 60-300). Raman spectra were obtained using a Thermo Fisher Scientific DXR with a 532 nm laser. The specific area and pore size distribution of the samples were determined by nitrogen adsorption/desorption isotherm measurements using a Tristar II 3020 gas adsorption analyzer. X-ray photoelectron spectroscopy (XPS) measurement was performed on ESCALAB 250XI spectrometer with Al K $\alpha$  X-ray radiation as the X-ray source for excitation.

## Electrochemical measurements

All electrochemical tests were performed on electrochemical workstation (Chenhua, CHI760E) with a three-electrode system at room temperature. Ring disk electrode (RDE, 5 mm diameter) used as working electrode, a graphite rod as counter electrode, and Hg/HgO as reference electrode. All potential values were given with the respective to reversible hydrogen electrode (RHE) scale and converted from Hg/HgO electrode by using  $E_{(\text{RHE})} = E_{(\text{Hg}/\text{HgO})} + 0.059 \text{ pH} + 0.098 \text{ (25 } ^\circ\text{C)}$ . In this work, 5 mg of catalytic material, 25  $\mu\text{L}$  of Nafion (5 wt%), and 300  $\mu\text{L}$  of absolute ethanol were added into 700  $\mu\text{L}$  of high-purity water, and ultrasound for 30 min to form an evenly dispersed catalyst ink. Then the ink catalyst (4  $\mu\text{L}$ ) was dropped onto working electrode with an electrochemical loading of  $0.28 \text{ mg cm}^{-2}$ , then dried at room temperature. The commercial Pt/C (20 wt%) and IrO<sub>2</sub> were obtained with equivalent mass loadings.

To assess the ORR catalytic activity, cyclic voltammetry (CV) measurements were carried out at a scan rate of  $50 \text{ mV s}^{-1}$  in an Ar/O<sub>2</sub>-saturated 0.1 M KOH solution. Then, linear sweep voltammetry (LSV) profiles were performed with a scan rate of  $5 \text{ mV s}^{-1}$

in O<sub>2</sub>-saturated 0.1 M KOH solution under different disk rotation rates. The Tafel slope was obtained from the corresponding LSV curve. The ORR stability was assessed by chronoamperometric responses with a rotation rate of 400 rpm in O<sub>2</sub>-saturated 0.1 M KOH solution. For the anti-methanol test, the current was recorded when 3.0 M methanol was added into the electrolyte at 300 s.

The electron transfer number ( $n$ ) and kinetic current density ( $J_K$ ) for a typical ORR are calculated from the Koutecky-Levich equations:

$$J^{-1} = J_K^{-1} + B^{-1}\omega^{-1} \quad (3)$$

$$B = 0.2nFC_O D_O^{2/3} \nu^{-1/6} \quad (4)$$

Where  $J$  and  $J_K$  are the measured current density and kinetic current density respectively;  $\omega$  is the speed of RDE (rpm);  $\nu$  is the dynamic viscosity of the electrolyte (0.01 cm<sup>2</sup> s<sup>-1</sup> in 0.1 mol L<sup>-1</sup> KOH solution);  $F$  is the Faraday constant ( $F = 96485$  C mol<sup>-1</sup>);  $C_O$  is the concentration of oxygen in the electrochemical reaction (1.2×10<sup>-3</sup> mol L<sup>-1</sup> in a 0.1 mol L<sup>-1</sup> KOH solution),  $D_O$  is oxygen diffusion coefficient (1.93×10<sup>-5</sup>cm<sup>2</sup> s<sup>-1</sup> in 0.1 mol L<sup>-1</sup> KOH solution).

In order to further verify the number of transferred electrons, use the following equation to calculate the H<sub>2</sub>O<sub>2</sub> yield and the number of transferred electrons:

$$\text{H}_2\text{O}_2\% = 2 \frac{I_r}{I_d + \frac{I_r}{N}} \times 100\% \quad (5)$$

$$n = 4 \frac{I_d}{I_d + \frac{I_r}{N}} \quad (6)$$

In which  $I_r$  and  $I_d$  represent the ring current and the Faradaic current densities at the disc,  $N$  is the current collecting efficiency of the Pt ring and determined to be 0.43.

When test the OER catalytic activity, the LSV measurements were carried out in O<sub>2</sub> saturated 1 M KOH solution. All polarization curves were 85%-iR compensation. Electrochemical impedance spectroscopy (EIS) measurements were carried out in the same condition at open-circuit voltage from 1 to 10<sup>5</sup> Hz with a voltage of 5 mV. The electrochemical active surface area (ECSA) was determined by measuring the

capacitive current associated with double-layer charging from the scan-rate dependence of CVs.

### **Zin-air battery measurements.**

The liquid Zn-air battery was fabricated, in which 6.0 M KOH + 0.2 M  $\text{Zn}(\text{CH}_3\text{COO})_2 \cdot 2\text{H}_2\text{O}$  solution was employed as electrolyte, zinc sheet served as the anode and FeCo/N-CNTs-800-loaded carbon cloth ( $4 \text{ mg cm}^{-2}$ ) served as the air cathode, respectively. As the comparison, the battery was also assembled using the mixed catalyst of commercial Pt/C (20 wt%) and  $\text{IrO}_2$  with mass ratio of 1:1. All the testing measurements in this work were conducted at room temperature and pressure.

## Supplementary Figures

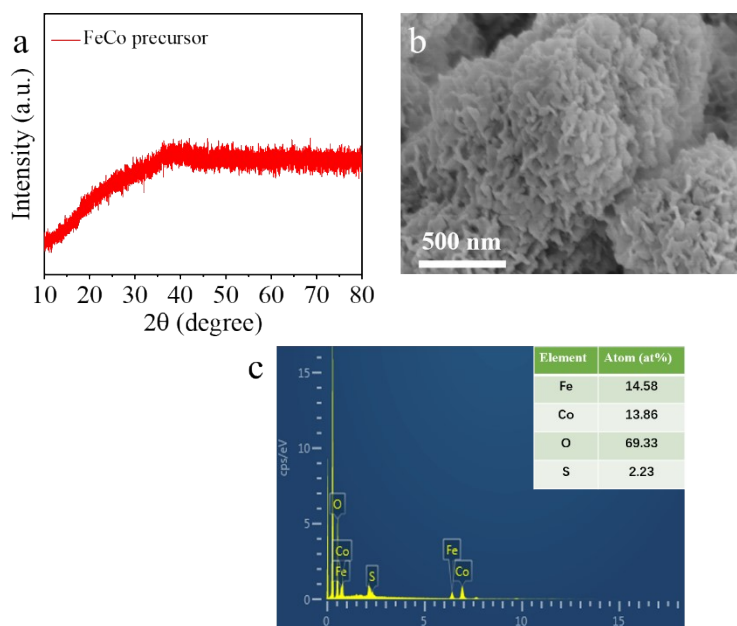

**Fig. S1** (a) XRD pattern, (b) FESEM image and (c) EDS analysis of FeCo precursor.

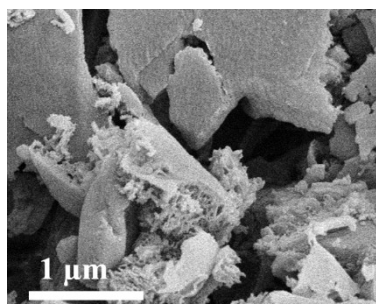

**Fig. S2** FESEM of pure CN-550.

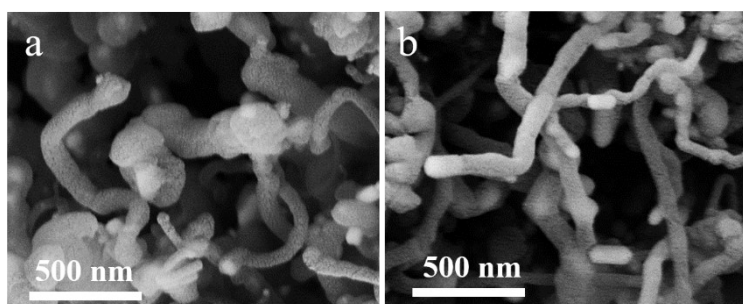

**Fig. S3** FESEM images of (a) Co/N-CNTs-800 and (b) Fe/N-CNTs-800 samples.

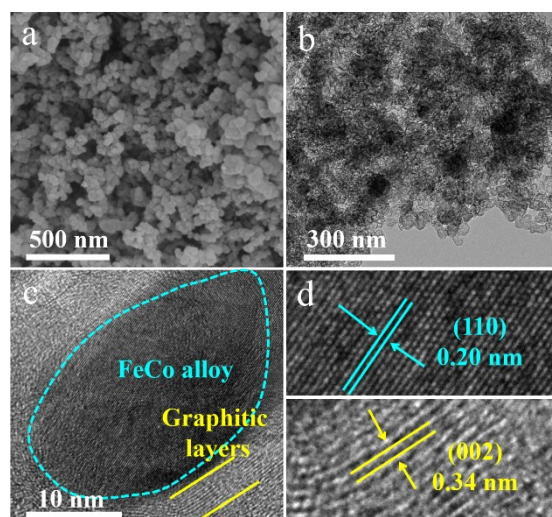

**Fig. S4** (a) FESEM, (b) TEM and (c-d) HRTEM images of FeCo/CB-800.

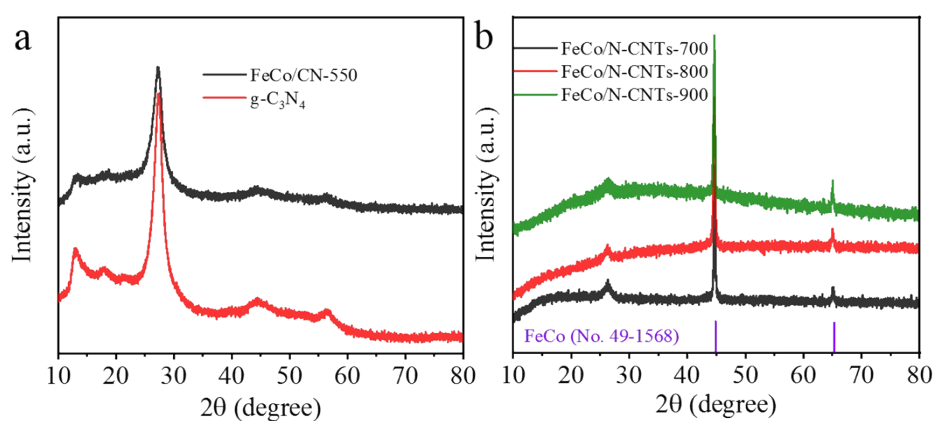

**Fig. S5** (a) XRD patterns of FeCo/CN-550 and  $g\text{-C}_3\text{N}_4$  samples. (b) XRD patterns of FeCo/N-CNTs-700, FeCo/N-CNTs-800 and FeCo/N-CNTs-900 samples.

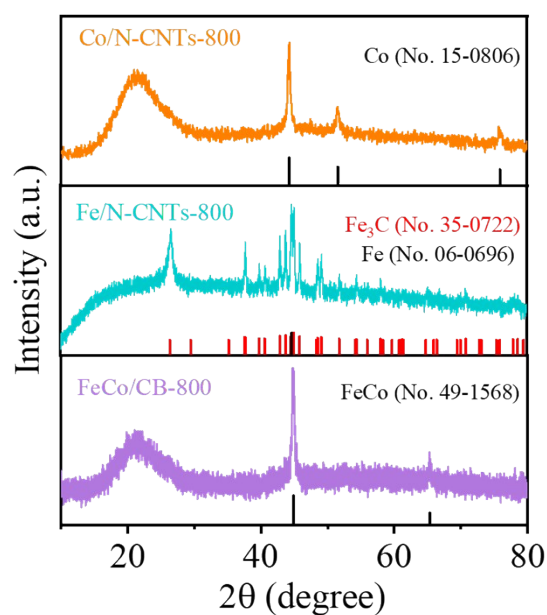

**Fig. S6** XRD patterns of Co/N-CNTs-800, Fe/N-CNTs-800 and FeCo/CB-800 samples.

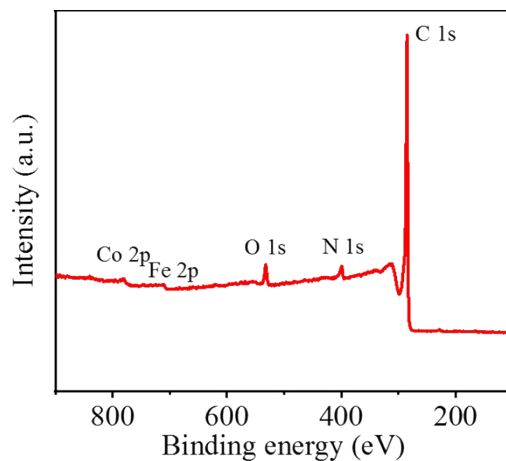

**Fig. S7** XPS survey spectrum of FeCo/N-CNTs-800.

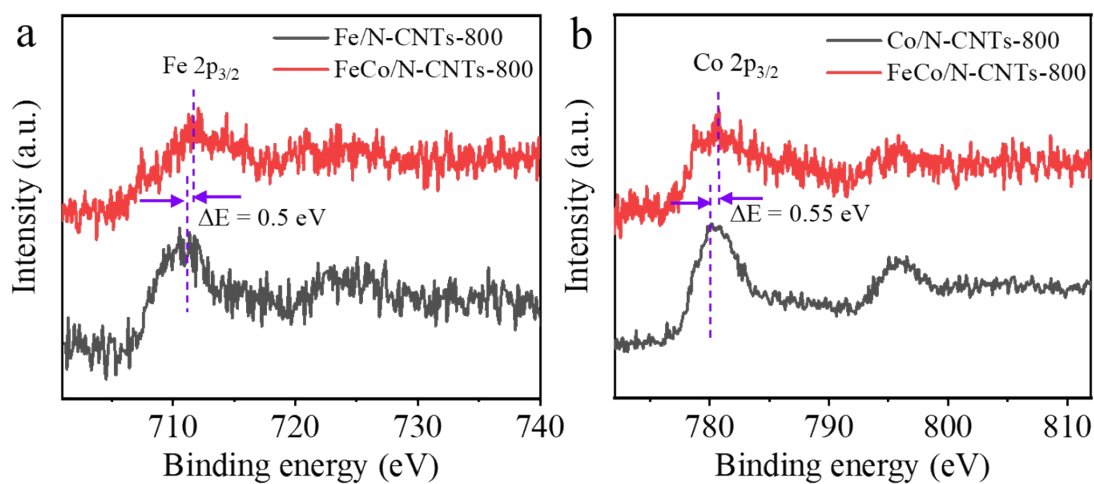

**Fig. S8** (a) High-resolution Fe 2p XPS spectra for FeCo/N-CNTs-800 and Fe/N-CNTs-800, (b) high-resolution Co 2p XPS spectra for FeCo/N-CNTs-800 and Co/N-CNTs-800.

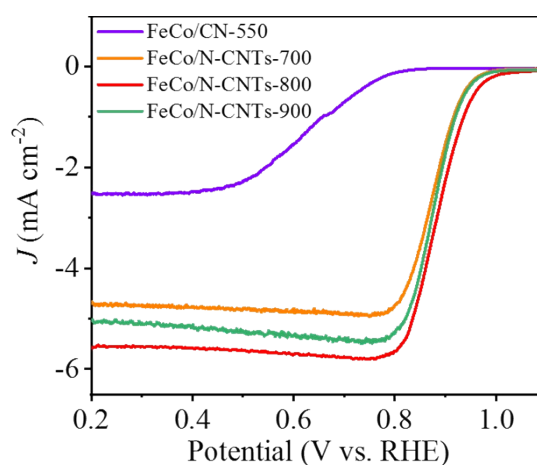

**Fig. S9** LSV curves of FeCo/N-CNTs-T catalysts synthesized at different pyrolysis temperatures (550, 700, 800 and 900 °C) in O<sub>2</sub>-saturated 0.1 M KOH solution at a rotation speed of 1600 rpm.

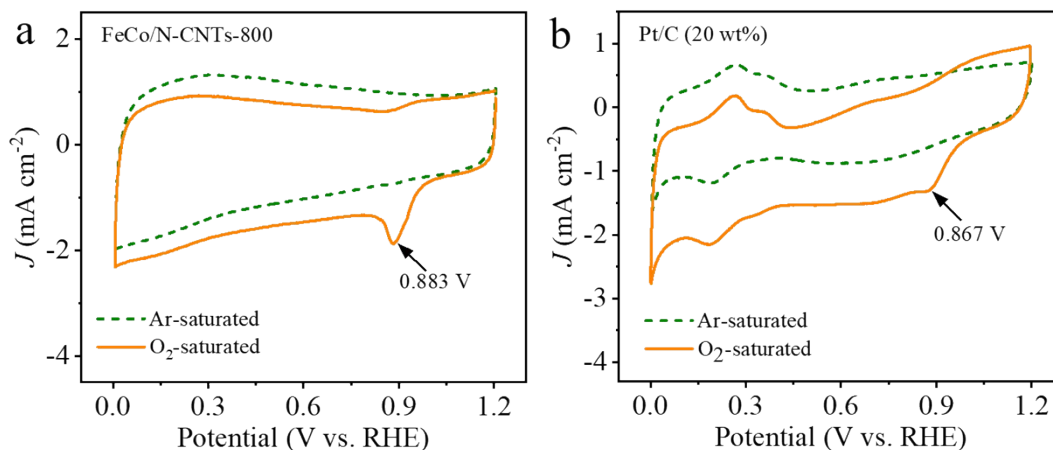

**Fig. S10** CVs of (a) FeCo/N-CNTs-800 and (b) Pt/C (20 wt%) in O<sub>2</sub>-saturated and Ar-saturated 0.1 M KOH solution at a scan rate of 5 mV s<sup>-1</sup>.

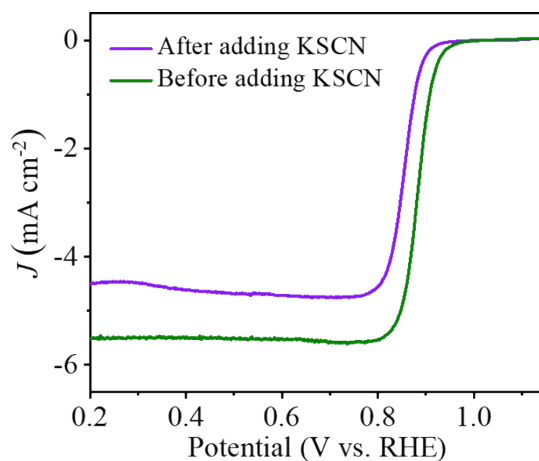

**Fig. S11** (a) LSV curves of FeCo/N-CNTs-800 in O<sub>2</sub>-saturated 0.1 M KOH before and after the addition of 0.05 M KSCN.

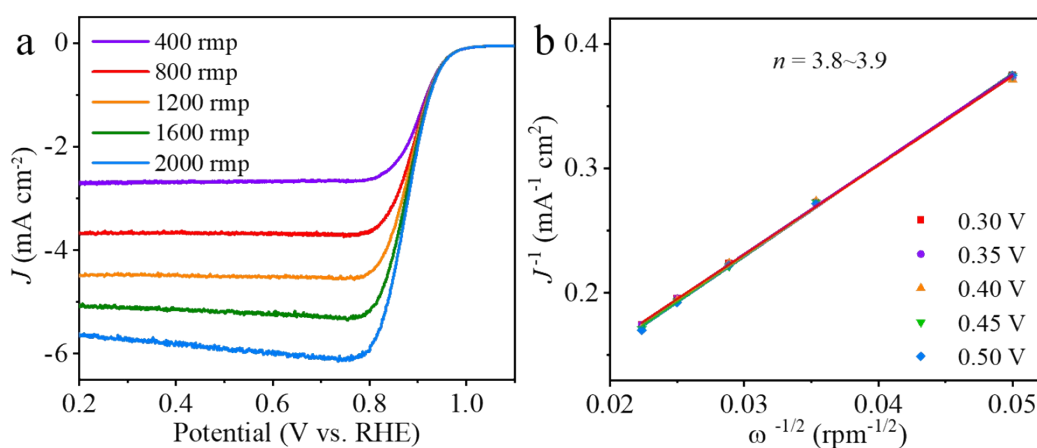

**Fig. S12** (a) LSV curves of Pt/C (20 wt%) at different rotation speeds and (b) corresponding Koutecky-Levich plots for Pt/C (20 wt%) at different potentials.



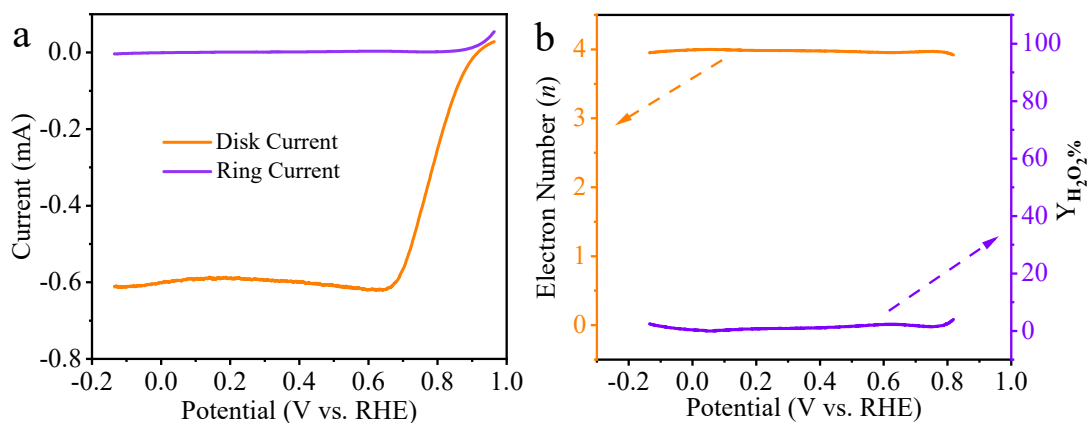

**Fig. S13** RRDE polarization curves (a) and the overall electron transfer number and H<sub>2</sub>O<sub>2</sub> yield (b) of FeCo/N-CNTs-800.

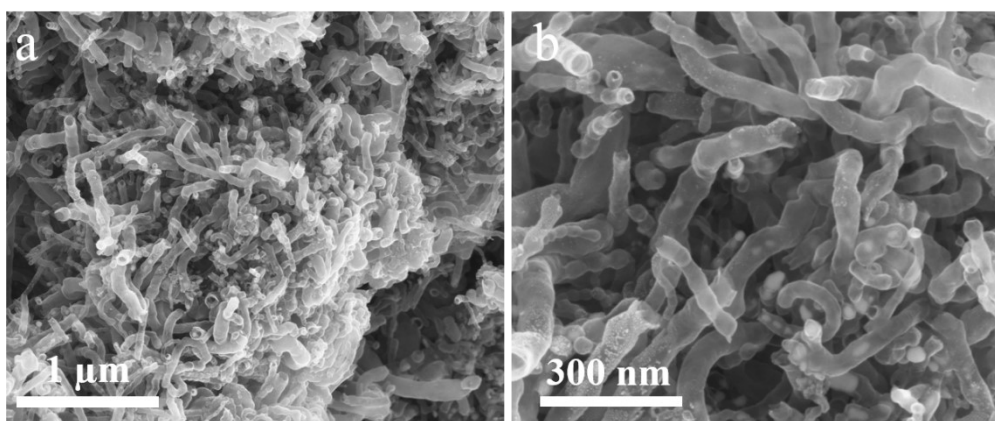

**Fig. S14** (a and b) SEM images of the after-ORR FeCo/N-CNTs-800 in 0.1 M KOH.

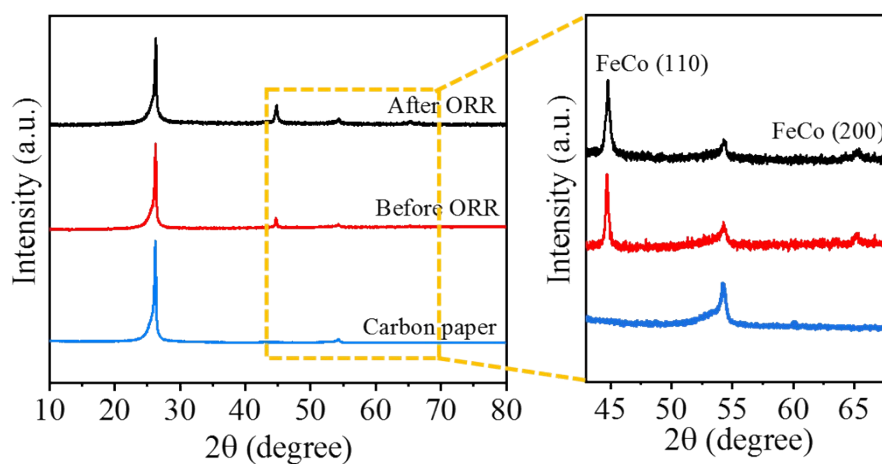

**Fig. S15** XRD pattern of FeCo/N-CNTs-800 loaded on carbon paper before and after the ORR reaction in 0.1 M O<sub>2</sub>-saturated KOH solution.

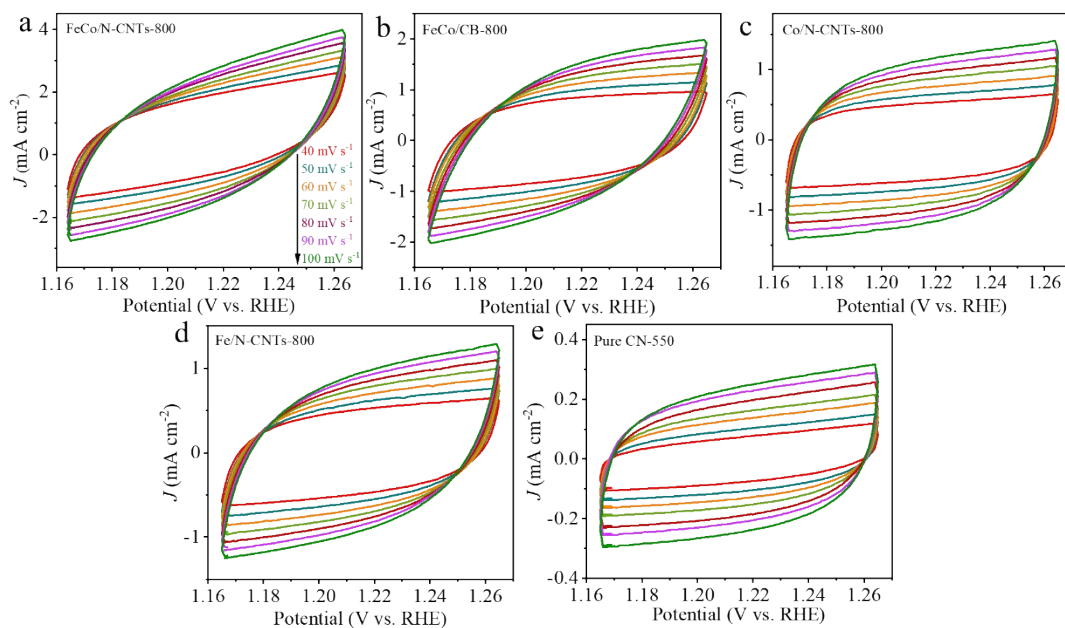

**Fig. S16** CV curves of (a) FeCo/N-CNTs-800, (b) FeCo/CB-800, (c) Co/N-CNTs-800, (d) Fe/N-CNTs-800 and (e) pure CN-550 in 1 M KOH with different scan rates.

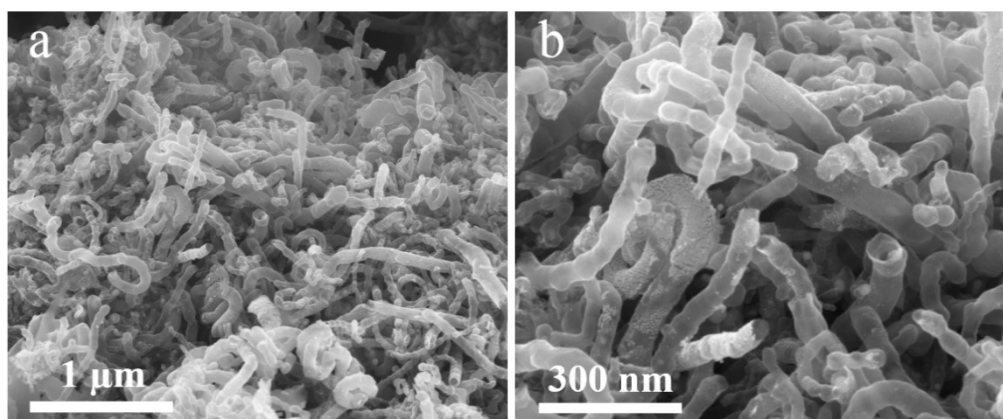

**Fig. S17** (a and b) SEM images of the after-OER FeCo/N-CNTs-800 in 1.0 M KOH.

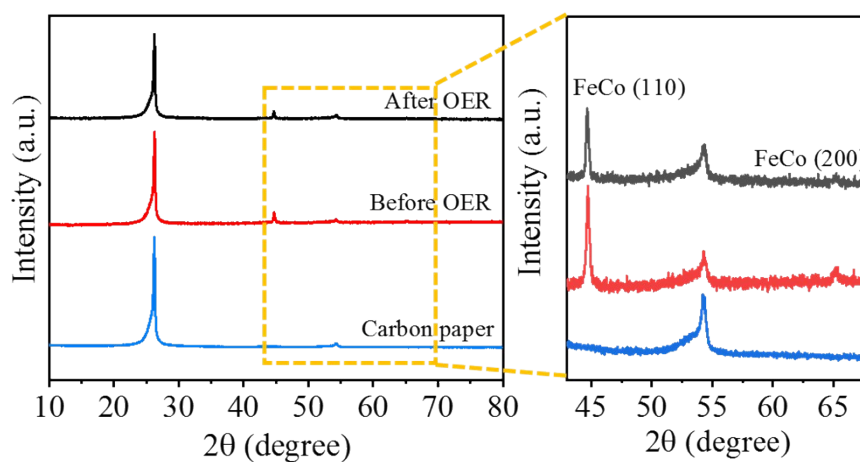

**Fig. S18** XRD pattern of FeCo/N-CNTs-800 loaded on carbon paper before and after the OER reaction in 1.0 M KOH solution.

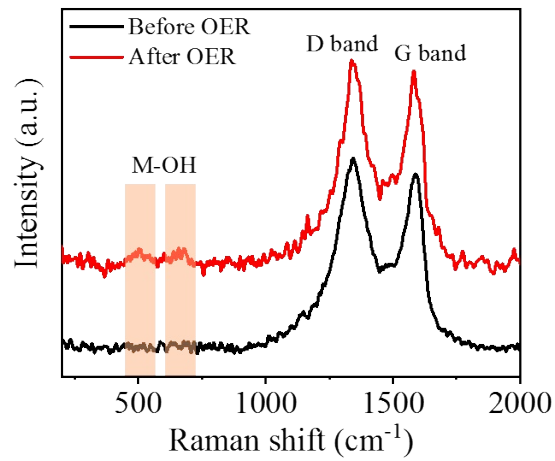

**Fig. S19** Raman spectra of FeCo/N-CNTs-800 loaded on carbon paper before and after OER reaction in 1.0 M KOH solution.

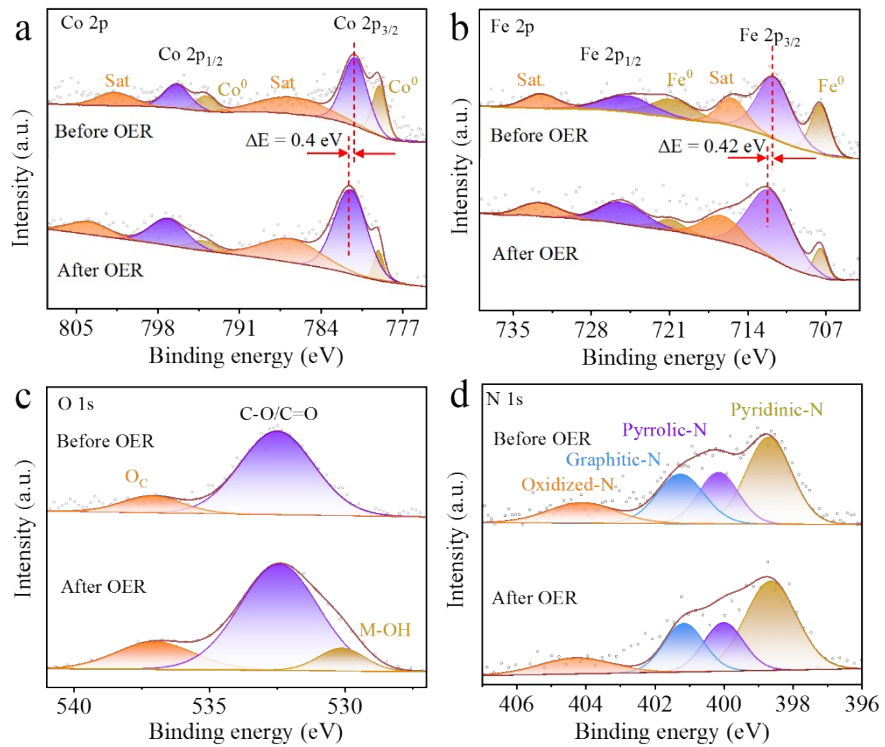

**Fig. S20** High-resolution (a) Co 2p, (b) Fe 2p, (c) O 1s and (d) N 1s XPS spectra of FeCo/N-CNTs-800 loaded on carbon paper before and after OER reaction in 1.0 M KOH solution.

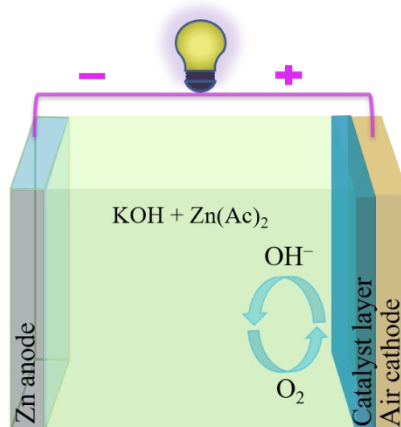

**Fig. S21** Schematic illustration of the rechargeable Zn-air battery.

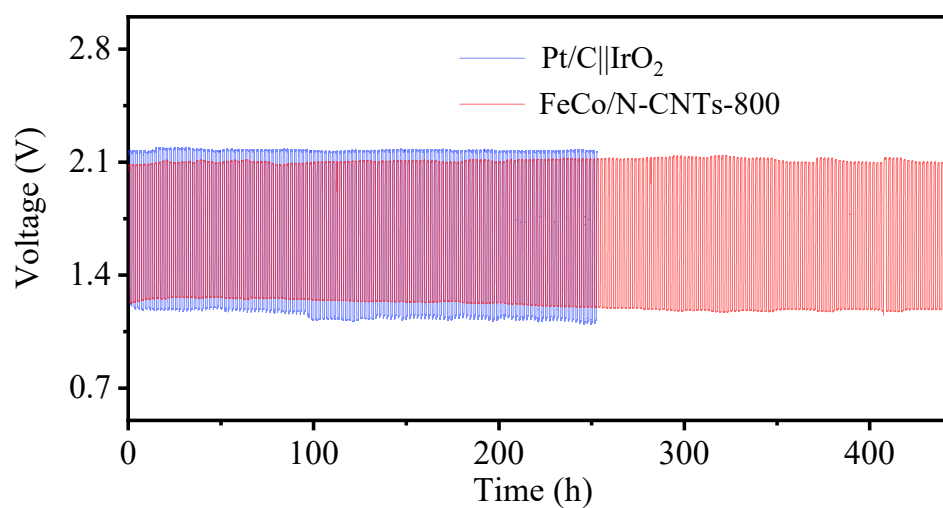

**Fig. S22** Long-term cycling performance at a current density of 10 mA cm<sup>-2</sup> with Pt/C||RuO<sub>2</sub> and FeCo/N-CNTs-800 as the air cathodes.

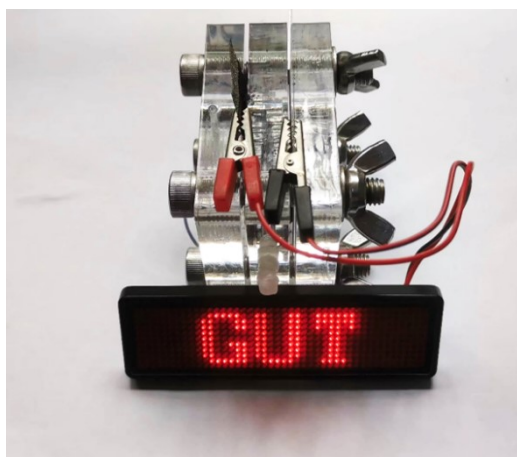

**Fig. S23** Optical picture of a red LED screen powered by a ZAB assembled with FeCo/N-CNTs-800.

**Table S1.** XPS analysis of C 1s, N 1s, Fe 2p, and Co2p in FeCo/N-CNTs-800.

| Elements | Atomic ration | Binding energy | Assignment      |
|----------|---------------|----------------|-----------------|
| C 1s     | 86.70         | 284.0          | C=C             |
|          |               | 284.8          | C-C             |
|          |               | 286.0          | C-N/C-O         |
|          |               | 288.4          | O-C=O           |
| N 1s     | 9.05          | 398.7          | Pyridinic-N     |
|          |               | 400.2          | Pyrrolic-N      |
|          |               | 401.3          | Graphitic-N     |
|          |               | 404.1          | Oxidized-N      |
| Fe 2p    | 1.68          | 707.5          | Fe <sup>0</sup> |
|          |               | 721.1          |                 |
|          |               | 711.9          | Ionic state     |
|          |               | 725.1          |                 |
|          |               | 715.6          | Sat             |
|          |               | 732.6          |                 |
| Co 2p    | 1.57          | 779.1          | Co <sup>0</sup> |
|          |               | 793.9          |                 |
|          |               | 781.6          | Ionic state     |
|          |               | 796.5          |                 |
|          |               | 786.9          | Sat             |
| 801.7    |               |                |                 |

**Table S2.** Comparison of OER/ORR electrocatalytic properties of FeCo/N-CNTs-800 with recently reported advanced catalysts.

| Catalysts                                  | OER             | ORR                |              | Reference        |
|--------------------------------------------|-----------------|--------------------|--------------|------------------|
|                                            | $E_{j=10}$ (mV) | $E_{\text{onset}}$ | $E_{1/2}$    |                  |
| NPC/FeCo@NCNT                              | 339             | 0.87               | 0.835        | [1]              |
| Fe <sub>1</sub> Co <sub>2</sub> -NC        | 356             | 1.04               | 0.88         | [2]              |
| FeCo/D-DNC                                 | 390             | 0.89               | 0.81         | [3]              |
| FeCo/N-GCT                                 | 500             | 0.91               | 0.79         | [4]              |
| N-GCNT/ FeCo-3                             | 500             | 1.03               | 0.92         | [5]              |
| meso/micro-FeCo-Nx-CN                      | 480             | 0.945              | 0.886        | [6]              |
| FeCo/Co <sub>2</sub> P@NPCF                | 330             | 0.85               | 0.79         | [7]              |
| FeCo/N-CNTs@CC                             | 408             | 0.87               | 0.816        | [8]              |
| FeCo@NCNS                                  | 367             | 0.98               | 0.827        | [9]              |
| f-FeCo-CNT                                 | 480             | /                  | 0.86         | [10]             |
| Co <sub>0.5</sub> Fe <sub>0.5</sub> S@N-MC | 410             | 0.91               | 0.81         | [11]             |
| FeCo-DHO/NCNTs                             | 320             | 0.91               | 0.80         | [12]             |
| Fe <sub>SA</sub> /FeO <sub>NC</sub> /NSC   | /               | 0.99               | 0.86         | [13]             |
| <b>FeCo/N-CNTs-800</b>                     | <b>359</b>      | <b>1.004</b>       | <b>0.891</b> | <b>This work</b> |

**Table S3.** Comparison of FeCo/N-CNTs-800 and other reported electrocatalysts for rechargeable zinc-air batteries.

| Catalysts                   | Power density<br>(mW cm <sup>-2</sup> ) | Cycling condition       | Stability<br>(h) | Reference |
|-----------------------------|-----------------------------------------|-------------------------|------------------|-----------|
| FeCo@MNC                    | 115                                     | 10 min per cycle        | 24               | [14]      |
| NiFe@N-CF                   | 102                                     | 20 min per cycle        | 100              | [15]      |
| Pd/FeCo                     | 117                                     | 30 min per cycle        | 200              | [16]      |
| FeCo/N-CNTs@CC              | 132                                     | 10 min per cycle        | 40               | [8]       |
| FeCo/Co <sub>2</sub> P@NPCF | 154                                     | 10 min per cycle        | 107              | [7]       |
| N-GCNT/FeCo-3               | 97.6                                    | 10 min per cycle        | 40               | [5]       |
| CoNi@NCNT/NF                | 127                                     | 30 min per cycle        | 45               | [17]      |
| NiFe@N-CFs                  | 102                                     | 60 min per cycle        | 150              | [18]      |
| CoNi/BCF                    | 155                                     | 30 min per cycle        | 200              | [19]      |
| Ni <sub>3</sub> Fe/N-C      | 134                                     | 60 min per cycle        | 300              | [20]      |
| <b>FeCo/N-CNTs-800</b>      | <b>200.4</b>                            | <b>60 min per cycle</b> | <b>445</b>       | This work |

## References:

1. X. Hao, Z. Jiang, B. Zhang, X. Tian, C. Song, L. Wang, T. Maiyalagan, X. Hao, Z.-J. Jiang, *Adv. Sci.*, 2021, **8**, 2004572.
2. Y. Lei, R.X. Huang, H.M. Xie, D.D. Zhang, X.Y. Liu, Y.J. Si, N. Li, *J. Alloys Compd.*, 2021, **853**, 157070.
3. G. Fu, Y. Liu, Y. Chen, Y. Tang, J.B. Goodenough, J-M. Lee, *Nanoscale.*, 2018, **10**, 19937-19944.
4. X. Liu, L. Wang, P. Yu, C. Tian, F. Sun, J. Ma, W. Li, H. Fu, *Angew. Chem. Int. Ed.*, 2018, **130**, 16398-16402.
5. C-Y. Su, H. Cheng, W. Li, Z-Q. Liu, N. Li, Z.F. Hou, F-Q. Bai, H-X. Zhang, T-Y. Ma, *Adv. Energy Mater.*, 2017, **7**, 1602420.
6. S. Li, C. Cheng, X. Zhao, J. Schmidt, A. Thomas, *Angew. Chem. Int. Ed.*, 2018, **57**, 1856-1862.
7. Q. Shi, Q. Liu, Y. Ma, Z. Fang, Z. Liang, G. Shao, B. Tang, W.Y. Yang, L. Qin, X.S. Fang, *Adv. Energy Mater.*, 2020, **10**, 1903854.
8. Z. Li, H. Yang, H. Sun, S. Liang, G. Lu, Z. Liu, S. Kou, *Acs. Sustain. Chem. Eng.*, 2021, **9**, 4498-4508.
9. T. Liu, S. Cai, Z. Gao, S. Liu, H. Li, L. Chen, M. Li, H. Guo, *Acta*, 2020, **335**, 135647.
10. Y. Wang, A. Kumar, M. Ma, Y. Jia, Y. Wang, Y. Zhang, G. Zhang, X. Sun, Z. Yan, *Nano Res.*, 2020, **13**, 1090-1099.
11. C.L. Li, M.C. Wu, R. Liu, *Appl. Catal. B Environ.*, 2019, **244**, 150e158.
12. Y. Niu, X. Teng, S. Gong, Z. Chen, *J. Mater. Chem. A*, 2020, **8**, 13725-13734.
13. F. Pan, Z. Li, Z. Yang, Q. Ma, M. Wang, H. Wang, M. Olszta, G. Wang, Z. Feng, Y. Du, Y. Yang, *Adv. Energy Mater.*, 2021, **11**, 2002204.
14. W. Niu, S. Pakhira, K. Marcus, Z. Li, J. L. *Adv. Energy Mater.*, 2018, **8**, 1800480.
15. Y.L. Niu, X. Teng, S.Q. Gong, Z.F. Chen, *J. Mater. Chem. A*, 2020, **8**, 13725–13734.
16. J.Y. Chen, H. Li, C. Fan, Q. W. Meng, Y.W. Tang, X.Y. Qiu, G.T. Fu, T.Y. Ma,



- Adv. Mater.*, 2020, **32**, 2003134.
17. H. Gong, X. Zheng, K. Zeng, B. Yang, X. Liang, L. Li, Y. Tao, R. Yang, *Carbon*, 2021, **174**, 475-483.
  18. Y. Wang, M. Qiao, X. Mamat, *Chem. Eng. J.*, 2020, **402**, 126214.
  19. W.J. Wan, X.J. Liu, H.Y. Li, X.Y. Peng, D.S. Xi, J. Luo, *Appl. Catal. B: Environ.*, 2019, **240**, 193–200.
  20. Y. Wang, M. Qiao, X. Mamat, *Chem. Eng. J.*, 2020, 402, 126214.
